# Supplementary material for: Facile Fabrication of Transparent and Opaque Albumin Methacryloyl Gels with Highly Improved Mechanical Properties and Controlled Pore Structures
Source: MDPI journal article supplement (doi:10.3390/gels8060367), 2022-06-10
Supplement: s1 [file s1]

Article

# Facile Fabrication of Transparent and Opaque Albumin Methacryloyl Gels with Highly Improved Mechanical Properties and Controlled Pore Structures

Mengdie Xu<sup>†1</sup>, Nabila Mehwish<sup>†1</sup> and Bae Hoon Lee<sup>1,2\*</sup>

<sup>1</sup> Wenzhou Institute, University of Chinese Academy of Sciences, Wenzhou 325011, China; xumd@wiucas.ac.cn (M.X.); nabila@wiucas.ac.cn (N.M.)

<sup>2</sup> Oujiang Laboratory (Zhejiang Lab for Regenerative Medicine, Vision and Brain Health), Wenzhou 325000, China

\* Correspondence: bhlee@ucas.ac.cn

† These authors contributed equally to this work.

## Supplementary Materials:

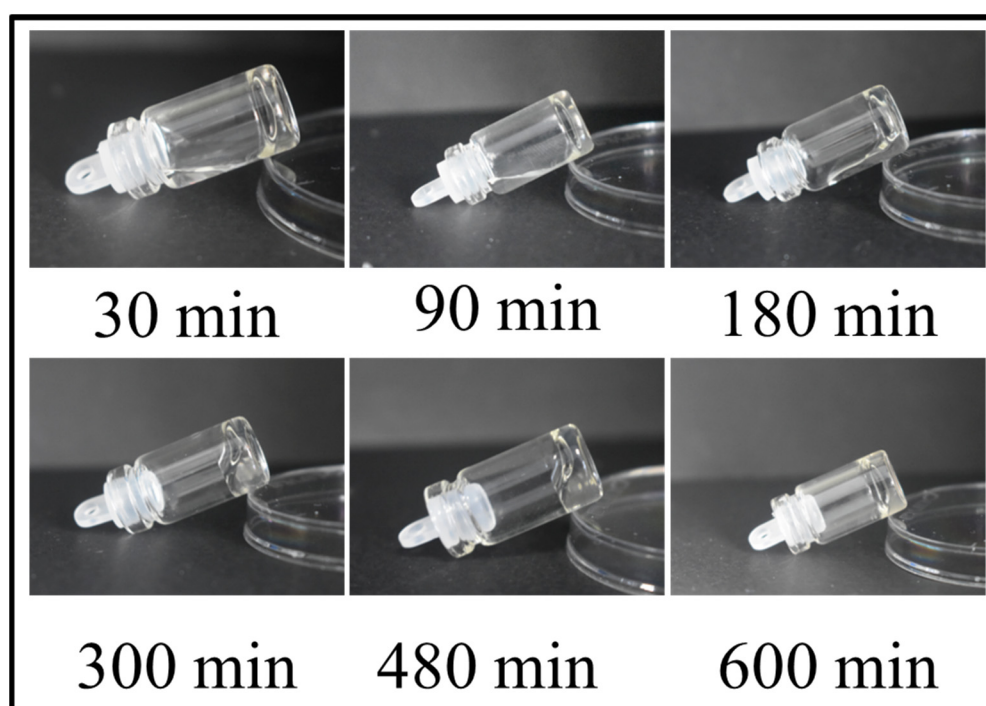

**Figure S1.** The RT sol-gel transition of 10% BSAMA as evaluated by a tilt-tube test under free radical polymerization at determined time points.

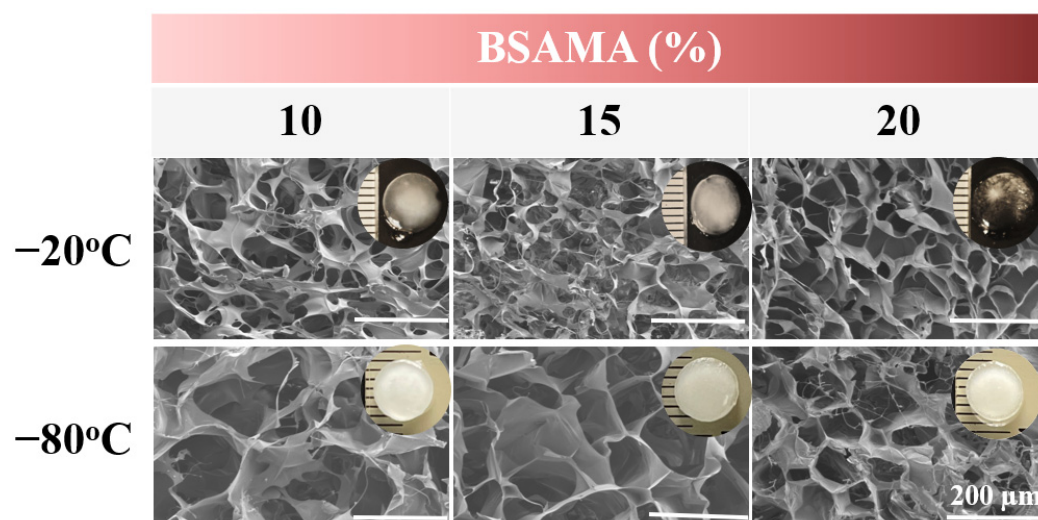

**Figure S2.** Optimization of cryogelation temperature. Representative SEM images of the gels obtained at −20 and −80 °C by using 10, 15, and 20% BSAMA concentrations. Insets in the images show the optical images of the as-obtained cryogels after thawing.

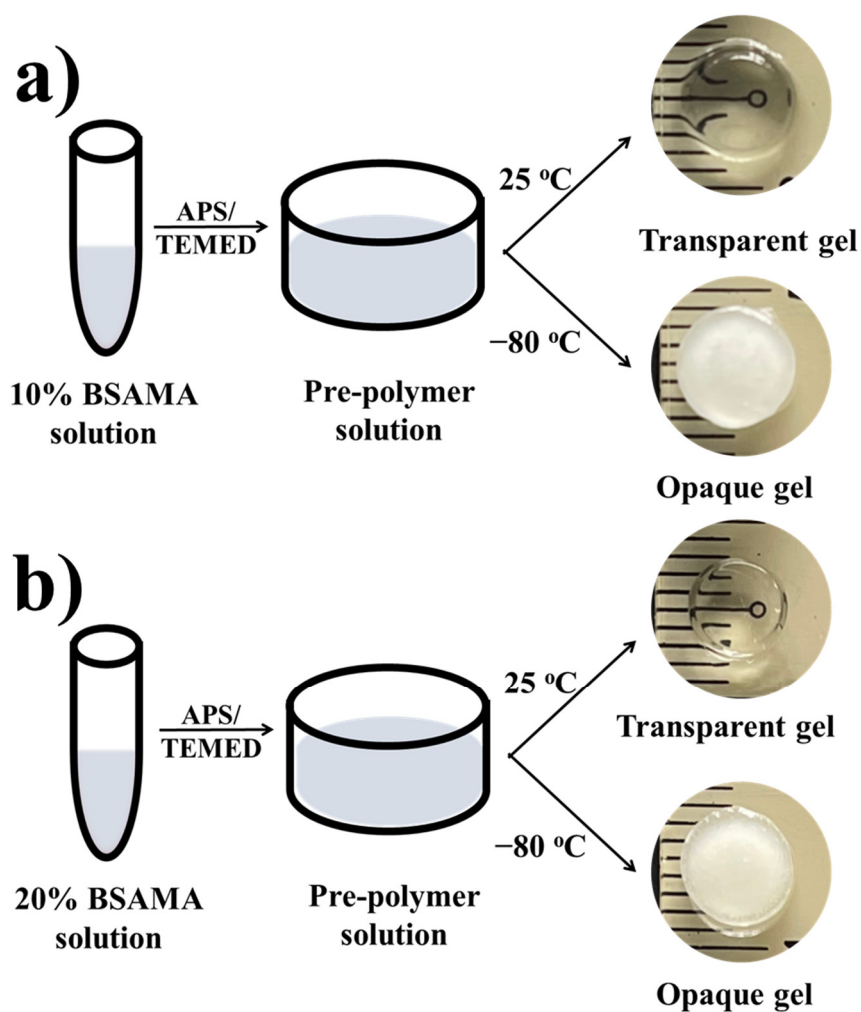

**Scheme S1.** Photographs of the transparent and opaque BSAMA gels as prepared by using 10% (a) and 20% (b) BSAMA solutions by free radical polymerization under different temperatures.

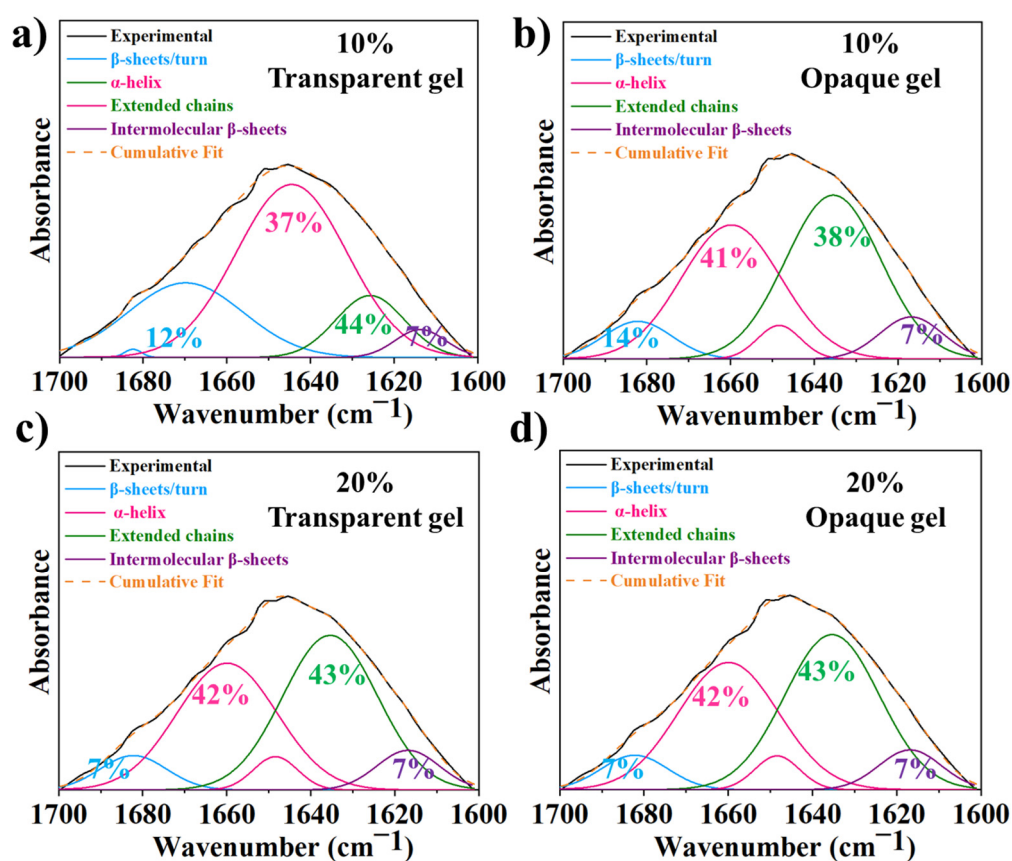

Figure S3. Normalized ATR-FTIR spectra of 10% BSAMA-based (a) transparent, (b) opaque gels, and 20% BSAMA based (c) transparent and d) opaque gels.

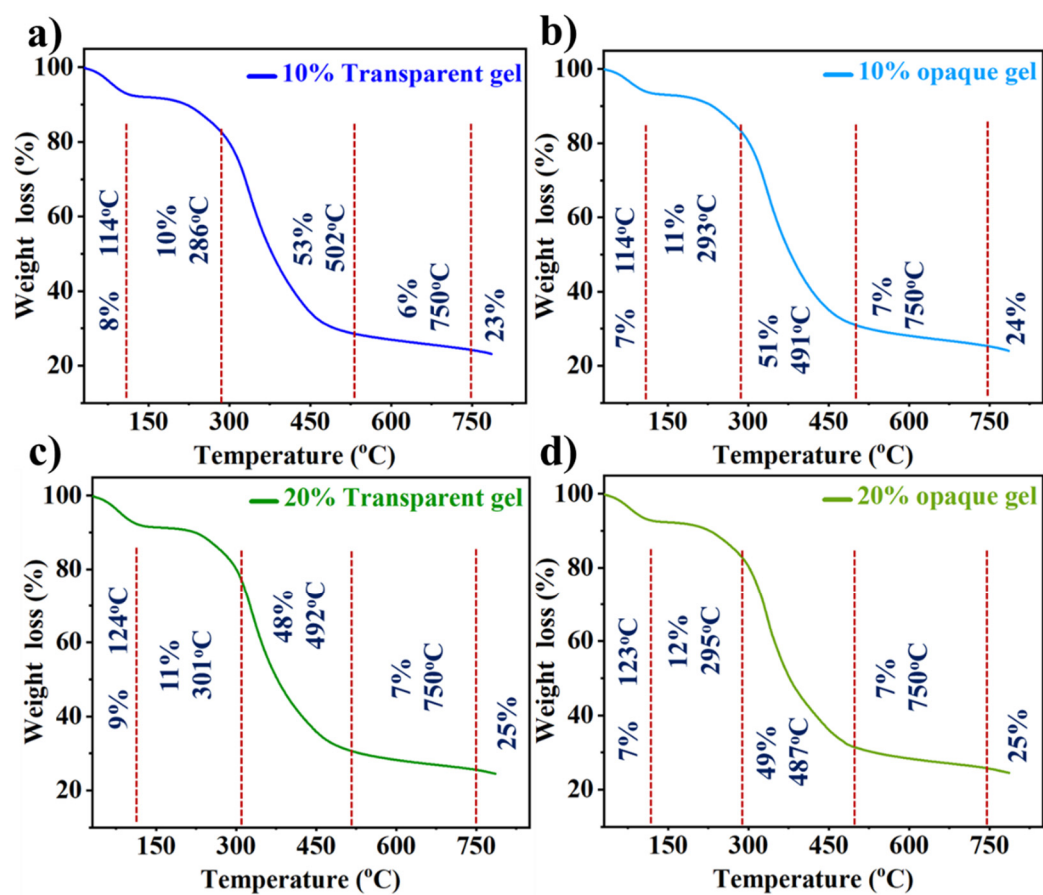

Figure S4. TGA curve of BSAMA (10% (w/v))-based (a) transparent and (b) opaque gels, and BSAMA (20% (w/v))-based c) transparent and d) opaque gels.

**Table S1.** Enzymatic degradation of BSAMA gels prepared at RT and −80 °C by using Proteinase K.

| 10% RT-Transparent gel |             |                                   |       |       |                                          |       |       |                         |
|------------------------|-------------|-----------------------------------|-------|-------|------------------------------------------|-------|-------|-------------------------|
| Time (min)             | Weight (mg) | Weight (mg) (3 replicate samples) |       |       | Residual rate (%) = $W_t/W_0 \times 100$ |       |       | Av. Residual rate (%)   |
|                        |             | $W_1$                             | $W_2$ | $W_3$ | $D_1$                                    | $D_2$ | $D_3$ | $= (D_1 + D_2 + D_3)/3$ |
| 0                      | $W_0$       | 134.90                            | 134.0 | 133.0 | 100                                      | 100   | 100   | 100                     |
| 10                     | $W_{10}$    | 126.2                             | 123.6 | 128.7 | 93.55                                    | 92.24 | 96.77 | 94.19                   |
| 20                     | $W_{20}$    | 119.9                             | 112.1 | 117.6 | 88.88                                    | 83.66 | 88.42 | 86.99                   |
| 30                     | $W_{30}$    | 87.8                              | 88.4  | 87.7  | 65.09                                    | 65.97 | 65.94 | 65.67                   |
| 40                     | $W_{40}$    | 59.9                              | 66.7  | 69.8  | 44.40                                    | 49.78 | 52.48 | 48.89                   |
| 50                     | $W_{50}$    | 35.9                              | 43.3  | 45.8  | 26.61                                    | 32.31 | 34.44 | 31.12                   |
| 60                     | $W_{60}$    | 25.4                              | 31.5  | 35.7  | 18.83                                    | 23.51 | 26.84 | 23.06                   |
| 120                    | $W_{120}$   | 0                                 | 0     | 0     | 0                                        | 0     | 0     | 0                       |
| 180                    | $W_{180}$   |                                   |       |       |                                          |       |       |                         |
| 240                    | $W_{240}$   |                                   |       |       |                                          |       |       |                         |
| 300                    | $W_{300}$   |                                   |       |       |                                          |       |       |                         |
| 10% −80-Opaque gel     |             |                                   |       |       |                                          |       |       |                         |
| Time (min)             | Weight (mg) | Weight (mg) (3 replicate samples) |       |       | Residual rate (%) = $W_t/W_0 \times 100$ |       |       | Av. Residual rate (%)   |
|                        |             | $W_1$                             | $W_2$ | $W_3$ | $D_1$                                    | $D_2$ | $D_3$ | $= (D_1 + D_2 + D_3)/3$ |
| 0                      | $W_0$       | 129.3                             | 131.6 | 130.8 | 100                                      | 100   | 100   | 100                     |
| 10                     | $W_{10}$    | 124.5                             | 127.8 | 123.9 | 96.29                                    | 97.11 | 94.72 | 96.04                   |
| 20                     | $W_{20}$    | 120.4                             | 123.0 | 117.9 | 93.12                                    | 93.46 | 90.14 | 92.24                   |
| 30                     | $W_{30}$    | 104.8                             | 108.8 | 106.1 | 81.05                                    | 82.67 | 81.12 | 81.61                   |
| 40                     | $W_{40}$    | 96.6                              | 103.9 | 103.1 | 74.71                                    | 78.95 | 78.82 | 77.49                   |
| 50                     | $W_{50}$    | 81.8                              | 88.9  | 91.9  | 63.26                                    | 67.55 | 70.26 | 67.03                   |
| 60                     | $W_{60}$    | 74.1                              | 71.8  | 80.7  | 57.31                                    | 54.56 | 61.69 | 57.85                   |
| 120                    | $W_{120}$   | 48.1                              | 53.7  | 55.6  | 37.20                                    | 40.81 | 42.51 | 40.17                   |
| 180                    | $W_{180}$   | 32.6                              | 40.1  | 34.3  | 25.21                                    | 30.47 | 26.22 | 27.30                   |
| 240                    | $W_{240}$   | 24.0                              | 26.3  | 22.1  | 18.56                                    | 19.98 | 16.89 | 18.48                   |
| 300                    | $W_{300}$   | 16.8                              | 16.2  | 13.1  | 12.99                                    | 12.31 | 10.01 | 11.77                   |
| 15% RT-Transparent gel |             |                                   |       |       |                                          |       |       |                         |
| Time (min)             | Weight (mg) | Weight (mg) (3 replicate samples) |       |       | Residual rate (%) = $W_t/W_0 \times 100$ |       |       | Av. Residual rate (%)   |
|                        |             | $W_1$                             | $W_2$ | $W_3$ | $D_1$                                    | $D_2$ | $D_3$ | $= (D_1 + D_2 + D_3)/3$ |
| 0                      | $W_0$       | 90.6                              | 91.9  | 89.2  | 100                                      | 100   | 100   | 100                     |
| 10                     | $W_{10}$    | 83.3                              | 80.4  | 79.1  | 91.94                                    | 87.48 | 88.67 | 89.37                   |
| 20                     | $W_{20}$    | 75.3                              | 72.8  | 71.1  | 83.12                                    | 79.21 | 79.71 | 80.68                   |
| 30                     | $W_{30}$    | 67.7                              | 66.9  | 65.8  | 74.72                                    | 72.79 | 73.76 | 73.76                   |
| 40                     | $W_{40}$    | 62.3                              | 61.3  | 60.8  | 68.76                                    | 66.70 | 68.16 | 67.87                   |
| 50                     | $W_{50}$    | 53.9                              | 55.8  | 54.0  | 59.49                                    | 60.72 | 60.54 | 60.25                   |
| 60                     | $W_{60}$    | 49.1                              | 50.6  | 48.3  | 54.19                                    | 55.06 | 54.15 | 54.46                   |
| 120                    | $W_{120}$   | 37.6                              | 38.9  | 37.1  | 41.50                                    | 42.33 | 41.59 | 41.81                   |
| 180                    | $W_{180}$   | 29.2                              | 33.9  | 30.2  | 32.23                                    | 36.88 | 33.85 | 34.32                   |
| 240                    | $W_{240}$   | 15.3                              | 17.3  | 15.7  | 16.88                                    | 18.82 | 17.60 | 17.77                   |
| 300                    | $W_{300}$   | 0                                 | 0     | 0     | 0                                        | 0     | 0     | 0                       |
| 15% −80-Opaque gel     |             |                                   |       |       |                                          |       |       |                         |
| Time (min)             | Weight (mg) | Weight (mg) (3 replicate samples) |       |       | Residual rate (%) = $W_t/W_0 \times 100$ |       |       | Av. Residual rate (%)   |

|     |           | $W_1$ | $W_2$ | $W_3$ | $D_1$ | $D_2$ | $D_3$ | $= (D_1 + D_2 + D_3)/3$ |
|-----|-----------|-------|-------|-------|-------|-------|-------|-------------------------|
| 0   | $W_0$     | 133   | 138.5 | 137.1 | 100   | 100   | 100   | 100                     |
| 10  | $W_{10}$  | 124.4 | 125.8 | 123.7 | 93.53 | 90.83 | 90.23 | 91.53                   |
| 20  | $W_{20}$  | 118.1 | 119.4 | 117.5 | 88.79 | 86.21 | 85.70 | 86.90                   |
| 30  | $W_{30}$  | 114.2 | 115.5 | 113.9 | 85.86 | 83.39 | 83.07 | 84.11                   |
| 40  | $W_{40}$  | 106.5 | 107   | 107.3 | 80.07 | 77.25 | 78.26 | 78.53                   |
| 50  | $W_{50}$  | 100.1 | 101.2 | 101.5 | 75.26 | 73.06 | 74.03 | 74.12                   |
| 60  | $W_{60}$  | 98.6  | 99    | 98.2  | 74.13 | 71.48 | 71.62 | 72.41                   |
| 120 | $W_{120}$ | 82.1  | 84.7  | 83.9  | 61.72 | 61.15 | 61.19 | 61.36                   |
| 180 | $W_{180}$ | 74.5  | 75.6  | 77.5  | 56.01 | 54.58 | 56.52 | 55.71                   |
| 240 | $W_{240}$ | 69.8  | 71.7  | 70.6  | 52.48 | 51.76 | 51.49 | 51.91                   |
| 300 | $W_{300}$ | 67.5  | 66.9  | 71.5  | 50.75 | 48.30 | 52.15 | 50.40                   |

## 20% RT-Transparent gel

| Time (min) | Weight (mg) | Weight (mg) (3 replicate samples) |       |       | Residual rate (%) = $W_t/W_0 \times 100$ |       |       | Av. Residual rate (%)   |
|------------|-------------|-----------------------------------|-------|-------|------------------------------------------|-------|-------|-------------------------|
|            |             | $W_1$                             | $W_2$ | $W_3$ | $D_1$                                    | $D_2$ | $D_3$ | $= (D_1 + D_2 + D_3)/3$ |
| 0          | $W_0$       | 128.3                             | 127.8 | 129.7 | 100                                      | 100   | 100   | 100                     |
| 10         | $W_{10}$    | 111.6                             | 112.0 | 115.8 | 86.98                                    | 87.63 | 89.28 | 87.96                   |
| 20         | $W_{20}$    | 108.2                             | 107.7 | 108.1 | 84.33                                    | 84.27 | 83.34 | 83.98                   |
| 30         | $W_{30}$    | 105.3                             | 103.0 | 106.8 | 82.07                                    | 80.59 | 82.34 | 81.67                   |
| 40         | $W_{40}$    | 93.9                              | 94.7  | 96.6  | 73.18                                    | 74.10 | 74.47 | 73.92                   |
| 50         | $W_{50}$    | 91.8                              | 92.2  | 92.5  | 71.55                                    | 72.14 | 71.31 | 71.67                   |
| 60         | $W_{60}$    | 87.3                              | 86.6  | 85.9  | 68.04                                    | 67.76 | 66.22 | 67.34                   |
| 120        | $W_{120}$   | 68.7                              | 69.3  | 69.7  | 53.54                                    | 54.22 | 53.74 | 53.84                   |
| 180        | $W_{180}$   | 57.4                              | 59.2  | 57.3  | 44.73                                    | 46.32 | 44.17 | 45.08                   |
| 240        | $W_{240}$   | 50.7                              | 52.7  | 52.8  | 39.51                                    | 41.23 | 40.71 | 40.48                   |
| 300        | $W_{300}$   | 42.4                              | 43.6  | 42.3  | 33.04                                    | 34.11 | 32.61 | 33.26                   |

## 20% -80-Opaque gel

| Time (min) | Weight (mg) | Weight (mg) (3 replicate samples) |       |       | Residual rate (%) = $W_t/W_0 \times 100$ |        |       | Av. Residual rate (%)   |
|------------|-------------|-----------------------------------|-------|-------|------------------------------------------|--------|-------|-------------------------|
|            |             | $W_1$                             | $W_2$ | $W_3$ | $D_1$                                    | $D_2$  | $D_3$ | $= (D_1 + D_2 + D_3)/3$ |
| 0          | $W_0$       | 128.3                             | 127.8 | 129.7 | 100                                      | 100    | 100   | 100                     |
| 10         | $W_{10}$    | 111.6                             | 112.0 | 115.8 | 86.98                                    | 87.63  | 89.28 | 87.96                   |
| 20         | $W_{20}$    | 108.2                             | 107.7 | 108.1 | 84.33                                    | 84.27  | 83.34 | 83.98                   |
| 30         | $W_{30}$    | 105.3                             | 103.0 | 106.8 | 82.07                                    | 80.59  | 82.34 | 81.67                   |
| 40         | $W_{40}$    | 93.9                              | 94.7  | 96.6  | 73.18                                    | 74.10  | 74.47 | 73.92                   |
| 50         | $W_{50}$    | 91.8                              | 92.2  | 92.5  | 71.55                                    | 72.14  | 71.31 | 71.67                   |
| 60         | $W_{60}$    | 87.3                              | 86.6  | 85.9  | 68.04                                    | 67.76  | 66.23 | 67.34                   |
| 120        | $W_{120}$   | 68.7                              | 69.3  | 69.7  | 53.54                                    | 54.22  | 53.74 | 53.83                   |
| 180        | $W_{180}$   | 57.4                              | 59.2  | 57.3  | 44.73                                    | 46.32  | 44.18 | 45.08                   |
| 240        | $W_{240}$   | 50.7                              | 52.7  | 52.8  | 39.52                                    | 41.243 | 40.71 | 40.48                   |
| 300        | $W_{300}$   | 42.4                              | 43.6  | 42.3  | 33.05                                    | 34.12  | 32.61 | 33.26                   |
